# Supplementary material
Source: PubMed Central journal article supplement (PMC8822899)
Supplement: Supplementary_Data.pdf [file Supplementary_Data.pdf]

Figure S1. Relation between LDH levels (U/l) and baseline plasma cfDNA levels (ng/ $\mu$ l) evaluated using a linear regression model (n=40). cfDNA, cell-free DNA; LDH, lactate dehydrogenase.

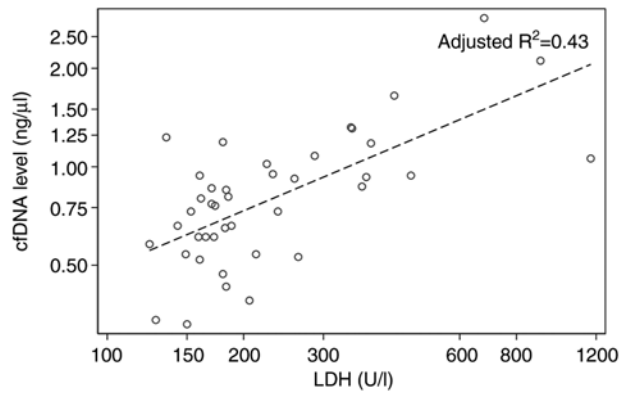

Table S1. Cox proportional hazards regression for PFS and OS.

| Variable                                                         | Univariate            |         |                       | Multivariate with cfDNA as a continuous variable |         |                       |         |
|------------------------------------------------------------------|-----------------------|---------|-----------------------|--------------------------------------------------|---------|-----------------------|---------|
|                                                                  | PFS                   |         | OS                    | PFS                                              |         | OS                    |         |
|                                                                  | Hazard ratio (95% CI) | P-value | Hazard ratio (95% CI) | Hazard ratio (95% CI)                            | P-value | Hazard ratio (95% CI) | P-value |
| Baseline cfDNA level, $\geq 75$ th vs. $< 75$ th percentile      | 3.03 (1.46-6.29)      | 0.003   | 3.48 (1.44-8.44)      | 6.67 (2.22-3.74)                                 | 0.006   | 7.39 (1.61-33.73)     | 0.01    |
| Age, above vs. below median                                      | 0.69 (0.35-1.33)      | 0.27    | 0.80 (0.34-1.89)      |                                                  | 0.61    |                       |         |
| Sex, female vs. male                                             | 1.10 (0.57-2.10)      | 0.78    | 1.35 (0.57-3.20)      |                                                  | 0.49    |                       |         |
| WHO performance status, $\geq 2$ vs. $< 2$                       | 3.76 (0.84-16.91)     | 0.08    | 11.43 (2.05-63.64)    |                                                  | 0.005   | 5.77 (0.75-44.37)     | 0.09    |
| Localisation primary tumor, rectum vs. colon                     | 0.98 (0.48-1.99)      | 0.95    | 0.72 (0.26-1.98)      |                                                  | 0.53    |                       |         |
| Sideness primary tumor, left vs. right                           | 0.83 (0.43-1.60)      | 0.57    | 0.92 (0.39-2.17)      |                                                  | 0.84    |                       |         |
| Resection status primary tumor, unresected vs. resected          | 1.27 (0.64-2.55)      | 0.50    | 0.73 (0.28-1.89)      |                                                  | 0.52    |                       |         |
| Number of lines of previous anticancer therapies, $\geq 1$ vs. 0 | 8.14 (1.67-39.60)     | 0.009   | 7.00 (1.44-33.73)     | 4.69 (0.94-23.37)                                | 0.016   | 3.49 (0.62-19.55)     | 0.16    |
| Time of metastases, metachronous vs. synchronous                 | 0.68 (0.33-1.38)      | 0.28    | 1.43 (0.60-3.38)      |                                                  | 0.42    |                       |         |
| Number of metastatic sites, $\geq 1$ vs. 1                       | 0.94 (0.48-1.87)      | 0.87    | 1.32 (0.52-3.30)      |                                                  | 0.56    |                       |         |
| Liver involvement, yes vs. no                                    | 2.26 (1.11-4.60)      | 0.025   | 1.44 (0.60-3.46)      | 1.33 (0.60-2.97)                                 | 0.41    |                       |         |
| Lung involvement, yes vs. no                                     | 0.72 (0.37-1.39)      | 0.33    | 1.30 (0.55-3.06)      |                                                  | 0.55    |                       |         |
| Tissue mutation status, RAS/BRAF mutation vs. wild-type          | 1.26 (0.55-2.90)      | 0.58    | 1.66 (0.49-5.63)      |                                                  | 0.42    |                       |         |
| LDH, $>$ vs. $<$ ULN                                             | 1.81 (0.92-3.58)      | 0.09    | 2.48 (1.04-5.92)      |                                                  | 0.04    | 1.19 (0.42-3.37)      | 0.75    |

OS, overall survival; PFS, progression-free survival; cfDNA, cell-free DNA; WHO, World Health Organization; LDH, lactate dehydrogenase; ULN, upper limit of normal ( $> 205$  U/l).

Table SII. Best treatment response according to RECIST v. 1.1 and association with cfDNA levels at baseline.

| Response        | cfDNA, ng/ $\mu$ l [median (95% CI)] |
|-----------------|--------------------------------------|
| PR              | 0.73 (0.52-0.97)                     |
| SD              | 0.70 (0.57-0.82)                     |
| PD <sup>a</sup> | 1.05 (0.50-1.96)                     |
| DC <sup>a</sup> | 0.73 (0.61-0.84)                     |

<sup>a</sup>Compared by Mann-Whitney U-test, P=0.04. None of the patients achieved complete response on study treatment. PR, partial response; SD, stable disease; PD, progressive disease; DC, disease control (PR+SD); cfDNA, cell-free DNA.
